# Supplementary material for: GTSE1 Is a Microtubule Plus-End Tracking Protein That Regulates EB1-Dependent Cell Migration
Source: PLoS One. 2012 Dec 7;7(12):e51259. doi: 10.1371/journal.pone.0051259 (PMC3517537; doi:10.1371/journal.pone.0051259)
Supplement: Table S1 — Class I phosphorylation sites surrounding SKIP motifs (503–538) in GTSE1 in mitotic HeLa cells. (XLSX) [file pone.0051259.s005.xlsx]

## Sheet: Sheet1
Supplementary Table 1. Class I phosphorylation sites surrounding SKIP motifs (503-538) in GTSE1 in mitotic HeLa cells
Position	Modified Sequence	Amino Acid	Localization Prob	Phospho (STY) Probabilities	Score	Score Diff	PEP
504	_SSGPAPQSIIS(ph)ARR_	S	0.998229	SSGPAPQS(0.002)LLS(0.998)ARR	132.05	27.5092	1.26684e-16
513	_VSAIPT(ph)PAS(ph)RR_	T	0.999997	VSALPT(1)PAS(1)RR	142.91	55.0716	6.65617e-10
516	_VSAIPT(ph)PAS(ph)RR_	S	1	VSALPT(1)PAS(1)RR	142.91	75.9964	6.65617e-10
520	_RCS(ph)GIPPMT(ph)PKT(ph)MPR_	S	1	RCS(1)GLPPMT(1)PKT(1)MPR	109.84	105.377	3.52724e-05
526	_RCS(ph)GIPPMT(ph)PKT(ph)MPR_	T	1	RCS(1)GLPPMT(1)PKT(1)MPR	109.84	105.377	3.52724e-05
529	_RCS(ph)GIPPMT(ph)PKT(ph)MPR_	T	1	RCS(1)GLPPMT(1)PKT(1)MPR	105.38	105.377	1.53197e-06
536	_AVGS(ph)PICVPARR_	S	1	AVGS(1)PLCVPARR	98.898	92.1118	0.000281147
