# Supplementary material for: GTSE1 Is a Microtubule Plus-End Tracking Protein That Regulates EB1-Dependent Cell Migration
Source: PLoS One. 2012 Dec 7;7(12):e51259. doi: 10.1371/journal.pone.0051259 (PMC3517537; doi:10.1371/journal.pone.0051259)
Supplement: Table S2 — Measurement of cell proliferation by cell counting associated with migration assays. (XLSX) [file pone.0051259.s006.xlsx]

## Sheet: Foglio1
Supplementary Table 2. Measurement of cell proliferation by cell counting associated with migration assays
Associated Figure	Fig. 3A							Fig. 3C					Fig. 5E			Fig. 5F
Cell line	U2OS		GTSE1 WT 204		GTSE1 Sk 202			H1299-GTSE1-WT		H1299-GTSE1-Sk			MDA-MB-231			MCF7
treatment	CON RNAi	GTSE1 RNAi	CON RNAi	GTSE1 RNAi	CON RNAi	GTSE1 RNAi		-	PonA	-	PonA		CON RNAi	GTSE1 RNAi		pBABE	pBABE-GTSE1
cell count (t=0h)	50000	50000	50000	50000	50000	50000		50000	50000	50000	50000		50000	50000		100000	100000
cell count(t=16h)	50487.7	49412	51133.3	50667.2	50023.5	49352.2		53066.7	52741.7	51233.3	51391.7		54708.3	54291.7		105583	103933
standard deviation	344.821	415.779	801.399	471.746	16.617	458.089		1721.43	1571.29	480.451	1011.29		1154.7	1201.28		877.971	1351.23
